# Supplementary material for: Life beyond a jar: Effects of tank size and furnishings on the behaviour and welfare of Siamese fighting fish (Betta splendens)
Source: PubMed Central journal article supplement (PMC11704571; doi:10.1017/awf.2024.67), 2024-12-23
Supplement: S0962728624000678sup001.pdf [file S0962728624000678sup001.pdf]

1 Supplementary material

2

3 Life beyond a jar: Effects of tank size and furnishings on the behaviour  
4 and welfare of Siamese fighting fish (*Betta splendens*)

5

6 Naomi Clark-Shen<sup>1</sup>, Juliette Tariel-Adam<sup>2</sup>, Anya Gajanur<sup>3</sup>, Culum Brown<sup>2</sup>

7

8 <sup>1</sup> Independent researcher, Singapore

9 <sup>2</sup> Macquarie University, School of Natural Sciences, Australia

10 <sup>3</sup> National University of Singapore, Department of Biological Sciences, Singapore

11 Author for correspondence: Culum Brown, email: [culum.brown@mq.edu.au](mailto:culum.brown@mq.edu.au)

12

13

14

15 **Table S1. Pair-wise contrasts between tanks: Comparison of the size of the difference**  
16 **between tanks for recorded behaviours using contrast estimates, associated *t*- or *z*-tests,**  
17 **confidence intervals, and *P*-values. Behaviours with a \* appended indicate the use of contrast**  
18 **odd ratios instead of estimates, *z*-test, and asymptomatic upper and lower confidence values**  
19 **to compare differences between tanks. Significant values are shown in bold.**

| Behaviour       | Contrasting tanks |        | Contrast Estimates | <i>t</i> -test/ <i>z</i> -ratio | Confidence Intervals |       | <i>P</i> -value  |
|-----------------|-------------------|--------|--------------------|---------------------------------|----------------------|-------|------------------|
|                 |                   |        |                    |                                 | Lower                | Upper |                  |
| <b>Swimming</b> | Jar               | Small  | -14                | -0.9                            | -56                  | 28    | >0.999           |
|                 | Jar               | Medium | -12                | -0.69                           | -59                  | 35    | >0.999           |
|                 | Jar               | Large  | -93                | -5.31                           | -140                 | -45   | <b>&lt;0.001</b> |
|                 | Small             | Medium | 2                  | 0.11                            | -45                  | 49    | >0.999           |
|                 | Small             | Large  | -79                | -4.53                           | -126                 | -32   | <b>&lt;0.001</b> |
|                 | Medium            | Large  | -81                | -5.32                           | -122                 | -39   | <b>&lt;0.001</b> |
|                 | Large             | Barren | 58                 | 3.76                            | 16                   | 101   | <b>&lt;0.001</b> |
| <b>Resting</b>  | Jar               | Small  | 46                 | 2                               | -17                  | 109   | 0.186            |
|                 | Jar               | Medium | -4                 | -0.16                           | -75                  | 67    | >0.999           |
|                 | Jar               | Large  | 110                | 4.19                            | 39                   | 181   | <b>&lt;0.001</b> |
|                 | Small             | Medium | -51                | -1.93                           | -122                 | 21    | 0.186            |

|                                  |        |        |       |       |       |        |                  |
|----------------------------------|--------|--------|-------|-------|-------|--------|------------------|
|                                  | Small  | Large  | 64    | 2.43  | -8    | 135    | 0.080            |
|                                  | Medium | Large  | 114   | 5.05  | 53    | 175    | <b>&lt;0.001</b> |
|                                  | Large  | Barren | -5    | -0.22 | -68   | 58     | >0.999           |
| <b>Foraging*</b>                 | Jar    | Small  | 1.88  | 1.15  | 0.428 | 8.250  | 0.251            |
|                                  | Jar    | Medium | 0.29  | -2.07 | 0.056 | 1.459  | 0.078            |
|                                  | Jar    | Large  | 0.08  | -3.97 | 0.014 | 0.437  | <b>&lt;0.001</b> |
|                                  | Small  | Medium | 0.15  | -2.9  | 0.027 | 0.875  | <b>0.015</b>     |
|                                  | Small  | Large  | 0.04  | -4.63 | 0.006 | 0.262  | <b>&lt;0.001</b> |
|                                  | Medium | Large  | 0.27  | -2.79 | 0.076 | 0.952  | <b>0.016</b>     |
|                                  | Large  | Barren | 14.64 | 4.92  | 3.378 | 63.486 | <b>&lt;0.001</b> |
| <b>Stereotypic Swimming*</b>     | Jar    | Small  | 0.03  | -4.56 | 0.003 | 0.229  | <b>&lt;0.001</b> |
|                                  | Jar    | Medium | 0.22  | -1.59 | 0.016 | 2.880  | 0.284            |
|                                  | Jar    | Large  | 0.18  | -1.77 | 0.014 | 2.417  | 0.284            |
|                                  | Small  | Medium | 7.87  | 2.39  | 0.775 | 79.810 | 0.100            |
|                                  | Small  | Large  | 6.60  | 2.20  | 0.660 | 66.078 | 0.138            |
|                                  | Medium | Large  | 0.84  | -0.3  | 0.171 | 4.130  | 0.767            |
|                                  | Large  | Barren | 0.32  | -1.8  | 0.060 | 1.743  | 0.284            |
| <b>Interaction with surface*</b> | Jar    | Small  | 1.68  | 1.15  | 0.503 | 5.580  | 0.497            |
|                                  | Jar    | Medium | 0.69  | -0.72 | 0.174 | 2.748  | 0.497            |
|                                  | Jar    | Large  | 4.39  | 2.80  | 1.061 | 18.167 | <b>0.030</b>     |
|                                  | Small  | Medium | 0.41  | -1.74 | 0.105 | 1.625  | 0.251            |
|                                  | Small  | Large  | 2.62  | 1.86  | 0.651 | 10.547 | 0.251            |
|                                  | Medium | Large  | 6.35  | 3.92  | 1.783 | 22.628 | <b>&lt;0.001</b> |
|                                  | Large  | Barren | 0.30  | -2.66 | 0.086 | 1.012  | <b>0.039</b>     |
| <b>Nesting*</b>                  | Jar    | Small  | 0.29  | -2.24 | 0.065 | 1.283  | 1.283            |
|                                  | Jar    | Medium | 0.25  | -2.15 | 0.046 | 1.410  | 1.410            |
|                                  | Jar    | Large  | 0.22  | -2.4  | 0.040 | 1.205  | 1.205            |
|                                  | Small  | Medium | 0.89  | -0.22 | 0.196 | 3.992  | 3.992            |
|                                  | Small  | Large  | 0.76  | -0.49 | 0.171 | 3.398  | 3.398            |
|                                  | Medium | Large  | 0.86  | -0.27 | 0.196 | 3.770  | 3.770            |
|                                  | Large  | Barren | 4.17  | 2.05  | 0.639 | 27.143 | 27.143           |

20

21 **Table S2. Results of resting place analysis: Contrasts between the probabilities of resting at**  
 22 **the three places. Significant values are shown in bold.**  
 23

|                                                                                             | Estimate | SE    | z.ratio | P-value          |
|---------------------------------------------------------------------------------------------|----------|-------|---------|------------------|
| $\log\left(\frac{P_{\text{resting on floor}}}{P_{\text{resting on furnishings}}}\right)$    | 0.04     | 0.038 | 0.1     | 0.991            |
| $\log\left(\frac{P_{\text{resting on floor}}}{P_{\text{resting on the water surf}}}\right)$ | 4.62     | 0.365 | 12.7    | <b>&lt;0.001</b> |

|                                                                                           |      |       |     |                  |
|-------------------------------------------------------------------------------------------|------|-------|-----|------------------|
| )                                                                                         |      |       |     |                  |
| $\log\left(\frac{P_{resting\ on\ furnishings}}{P_{resting\ on\ the\ water\ surf}}\right)$ | 4.58 | 0.464 | 9.9 | <b>&lt;0.001</b> |
| )                                                                                         |      |       |     |                  |

24  
25
